# Supplementary material
Source: publisher figshare collection journal article supplement (https://gsapubs.figshare.com/ndownloader/files/30790306)

Plate 2:  
Cenozoic Rocks of the Southern Grapevine and Northern Funeral Mountains  
Death Valley, California

Nikolas Midttun, Nathan Niemi, Bianca Gallina

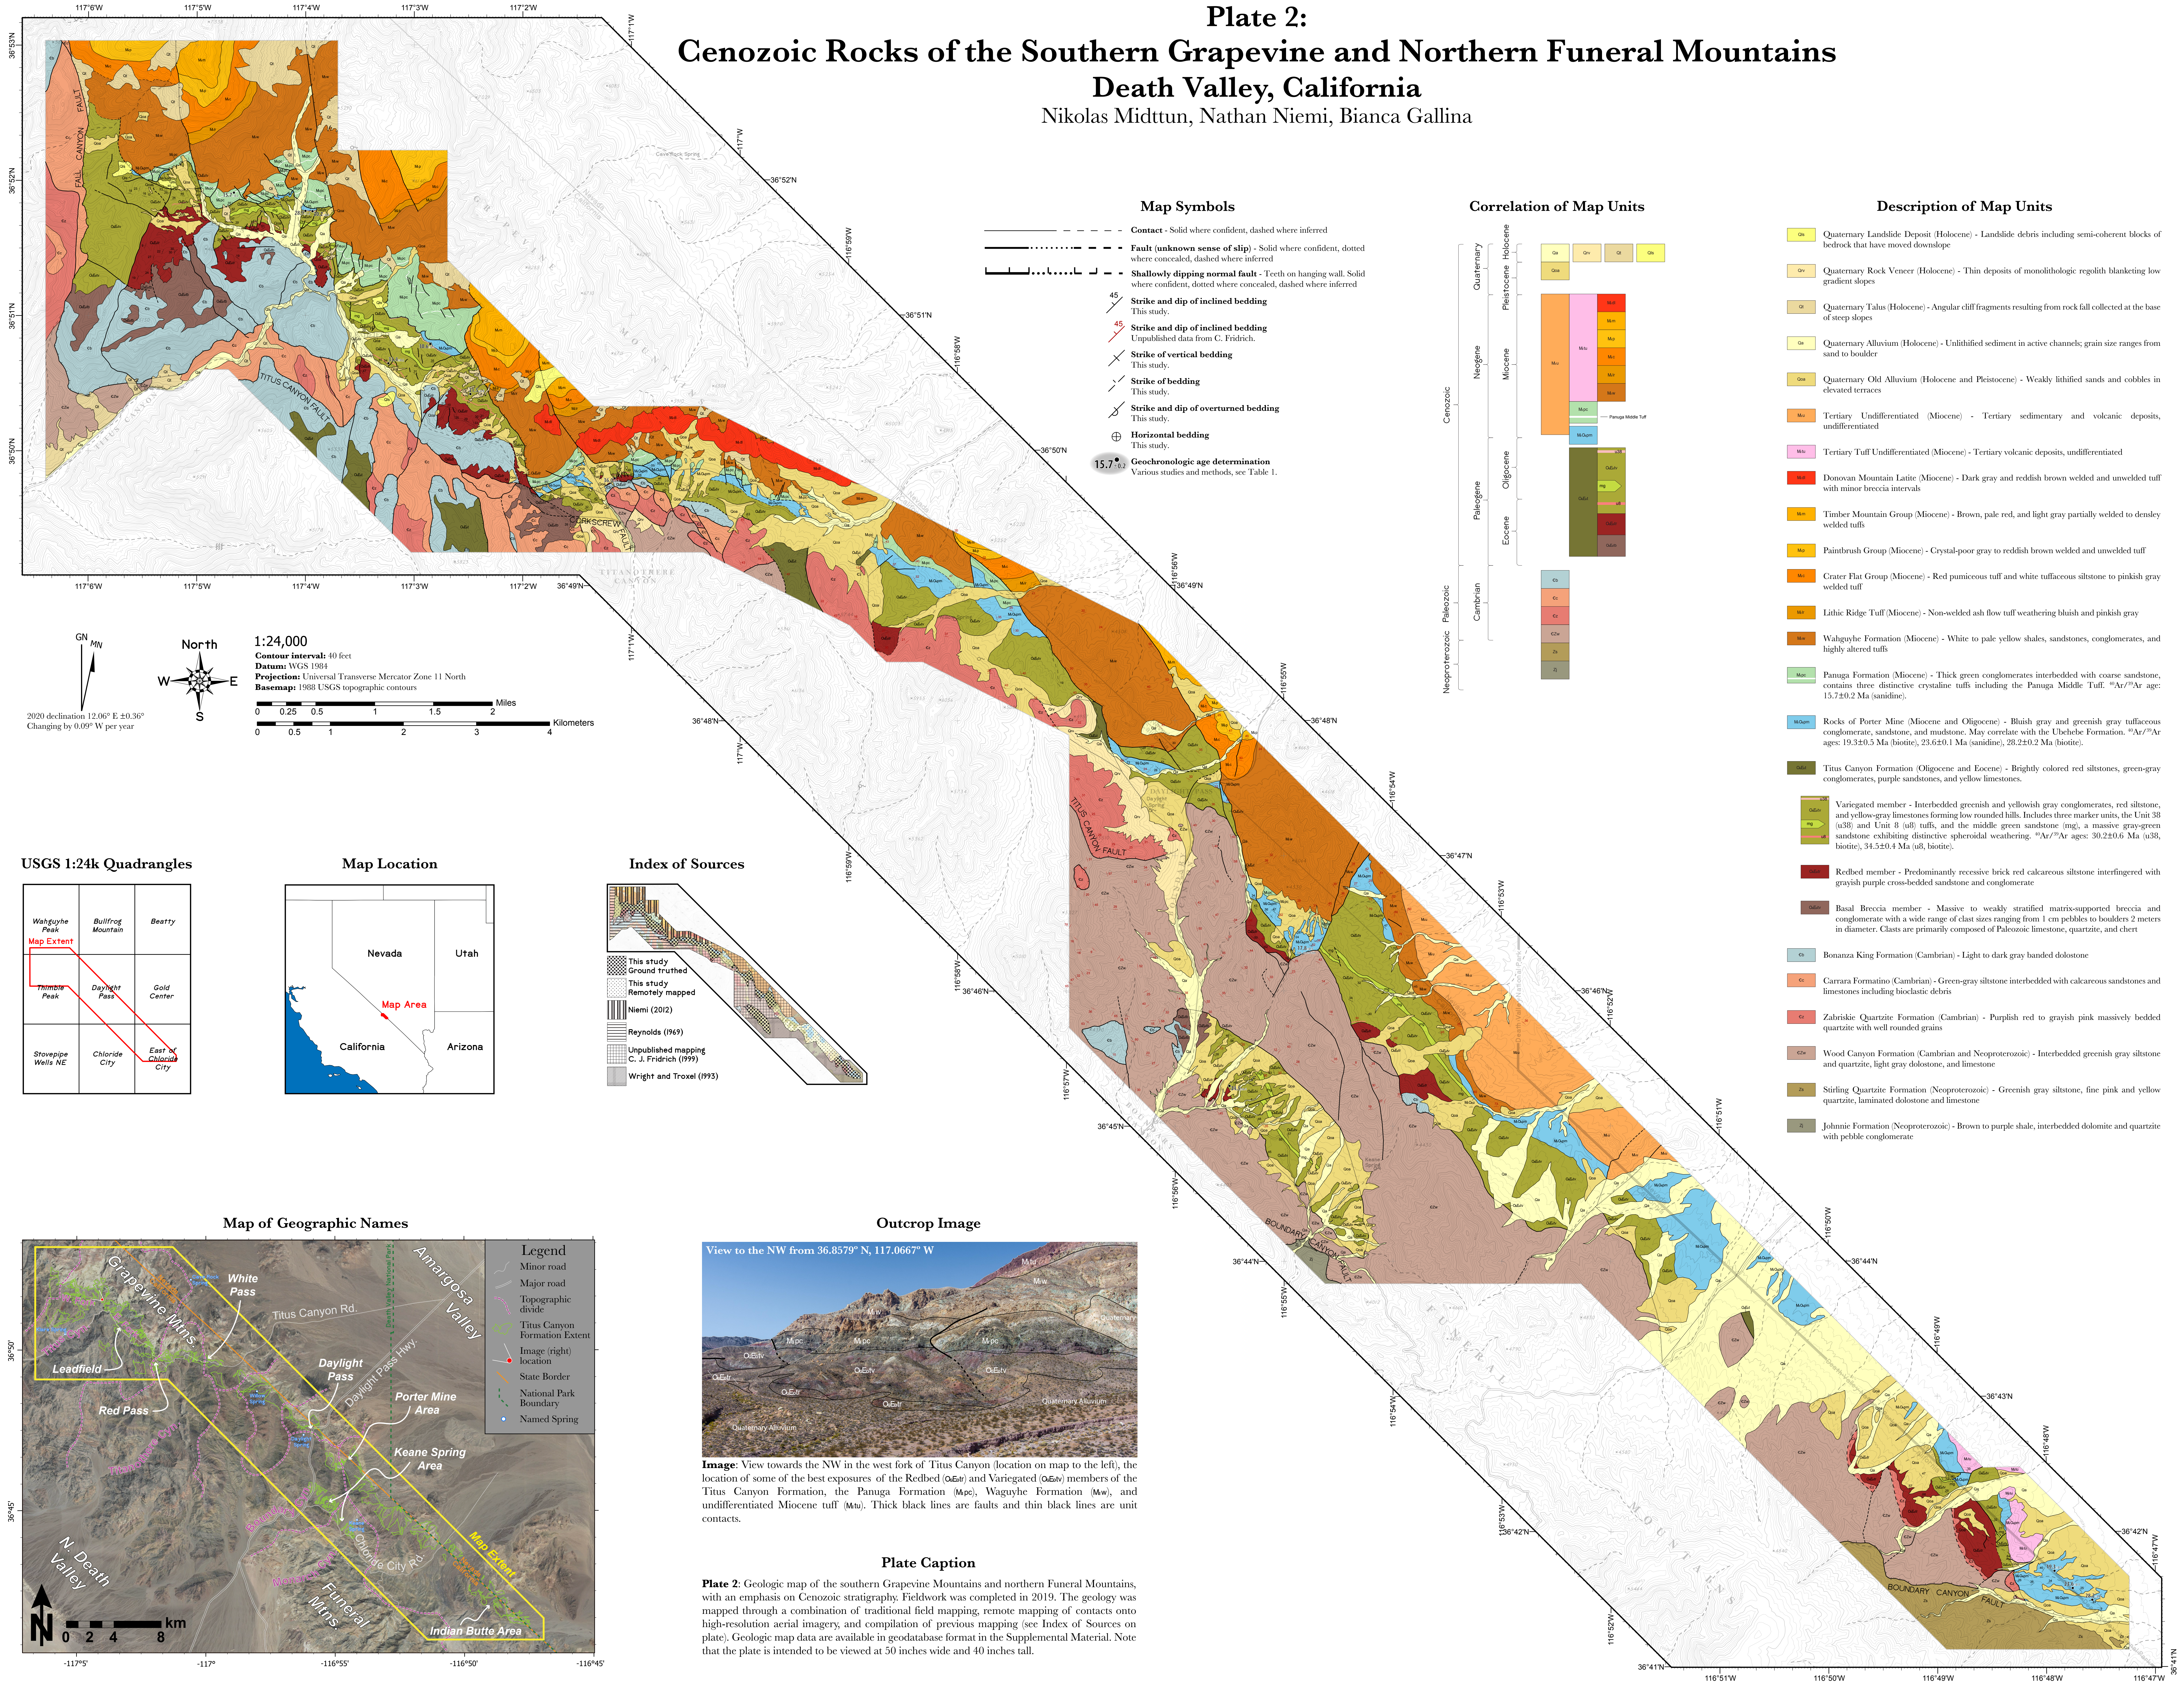

Supplement: Supplementary file 1 [file 30790306]
